# Supplementary material
Source: PubMed Central journal article supplement (PMC15758)
Supplement: pnas_030539197_1.pdf [file pnas_030539197_1.pdf]

In this section the complete set of differential equations and parameter values of the two models of glycolysis in *Trypanosoma brucei* is given. The model with the glycosome has been described previously (1, 2), and in these articles the references to the original kinetic studies are given. The MLAB source code is available from the authors on request.

### *Abbreviations*

|            |                                          |
|------------|------------------------------------------|
| AK         | adenylate kinase                         |
| ALD        | fructose-1,6-bisphosphate aldolase       |
| 1,3-BPGA   | 1,3-bisphosphoglycerate                  |
| c          | cytosolic                                |
| DHAP       | dihydroxyacetone phosphate               |
| ENO        | enolase                                  |
| Fru-1,6-BP | fructose 1,6-bisphosphate                |
| Fru-6-P    | fructose 6-phosphate                     |
| g          | glycosomal                               |
| Glc        | glucose                                  |
| GA-3-P     | glyceraldehyde 3-phosphate               |
| GAPDH      | glyceraldehyde-3-phosphate dehydrogenase |
| GDH        | glycerol-3-phosphate dehydrogenase       |
| GK         | glycerol kinase                          |
| Gly-3-P    | glycerol 3-phosphate                     |
| Glc-6-P    | glucose 6-phosphate                      |
| GPO        | glycerol-3-phosphate oxidase             |
| HK         | hexokinase                               |
| $K_{eq}$   | equilibrium constant                     |
| PEP        | phospho <i>enol</i> pyruvate             |
| 2-PGA      | 2-phosphoglycerate                       |
| 3-PGA      | 3-phosphoglycerate                       |
| PGI        | glucose-phosphate isomerase              |
| PFK        | phosphofructokinase                      |
| PGK        | phosphoglycerate kinase                  |
| PGM        | phosphoglycerate mutase                  |
| PYK        | pyruvate kinase                          |

|     |                           |
|-----|---------------------------|
| TIM | triosephosphate isomerase |
| tot | total                     |
| $V$ | volume                    |
| $v$ | enzyme rate               |

### Definitions

$$[\text{triose-P}] \equiv \frac{[\text{DHAP}]_c \cdot V_c + [\text{DHAP}]_g \cdot V_g + [\text{GA-3-P}]_g \cdot V_g}{V_{\text{tot}}}$$

$$[\text{N}] \equiv \frac{[\text{3-PGA}] \cdot (V_g + V_c) + [\text{2-PGA}]_c \cdot V_c + [\text{PEP}]_c \cdot V_c}{V_{\text{tot}}}$$

in which  $[\text{3-PGA}] \equiv [\text{3-PGA}]_c = [\text{3-PGA}]_g$ . Consequently:

$$[\text{N}] = \frac{[\text{3-PGA}] \cdot \left(1 + \frac{V_c}{V_g}\right) + [\text{2-PGA}]_c \cdot \frac{V_c}{V_g} + [\text{PEP}]_c \cdot \frac{V_c}{V_g}}{\left(1 + \frac{V_c}{V_g}\right)}$$

$P_g$  and  $P_c$  denote the sums of high energy phosphates in the glycosome and the cytosol, respectively:

$$[P]_g \equiv 2[\text{ATP}]_g + [\text{ADP}]_g$$

$$[P]_c \equiv 2[\text{ATP}]_c + [\text{ADP}]_c$$

### Model with the glycosome

The model with the glycome contains the following moiety conserved sums:

$$[\text{ATP}]_g + [\text{ADP}]_g + [\text{AMP}]_g = C_1$$

$$[\text{ATP}]_c + [\text{ADP}]_c + [\text{AMP}]_c = C_2$$

$$[\text{NADH}]_g + [\text{NAD}]_g = C_3$$

$$[\text{Gly-3-P}]_g + [\text{DHAP}]_g + [\text{Glc-6-P}]_g + [\text{Fru-6-P}]_g + 2[\text{Fru-1,6-BP}]_g + [\text{GA-3-P}]_g + [\text{1,3-BPGA}]_g + 2[\text{ATP}]_g + [\text{ADP}]_g = C_4$$

$$[\text{Gly-3-P}]_c + [\text{DHAP}]_c = C_5$$

The kinetics of GPO and the transport of pyruvate across the plasma membrane were described by irreversible Michaelis-Menten kinetics:

$$v = V^+ \cdot \frac{\frac{S}{K_s}}{1 + \frac{S}{K_s}}$$

in which S is the substrate concentration.

The kinetics of HK were described by an irreversible Michaelis-Menten type equation for two substrates:

$$v_{HK} = V^+ \cdot \left( \frac{\frac{[Glc]}{K_{m,Glc}}}{1 + \frac{[Glc]}{K_{m,Glc}} + \frac{[Glc-6-P]}{K_{m,Glc6P}}} \right) \cdot \left( \frac{\frac{[ATP]}{K_{m,ATP}}}{1 + \frac{[ATP]}{K_{m,ATP}} + \frac{[ADP]}{K_{m,ADP}}} \right)$$

The kinetics of GAPDH, PGK, GDH and GK were described by a reversible Michaelis-Menten equation for two non-competing product-substrate couples:

$$v = V^+ \cdot \frac{\frac{S_1}{K_{S1}} \cdot \frac{S_2}{K_{S2}} - \frac{V^-}{V^+} \cdot \frac{P_1}{K_{P1}} \cdot \frac{P_2}{K_{P2}}}{\left( 1 + \frac{S_1}{K_{S1}} + \frac{P_1}{K_{P1}} \right) \cdot \left( 1 + \frac{S_2}{K_{S2}} + \frac{P_2}{K_{P2}} \right)}$$

The transport of glucose was described according to a 4-state model for a symmetrical facilitated diffusion carrier

$$v_{\text{glucose transport}} = V^+ \cdot \frac{[Glc]_o - [Glc]_i}{K_{Glc} + [Glc]_o + [Glc]_i + \alpha \cdot [Glc]_o \cdot [Glc]_i / K_{Glc}}$$

in which  $[Glc]_i$  is the intracellular and  $[Glc]_o$  is the extracellular glucose concentration.  $K_{Glc}$  is the Michaelis constant for glucose transport.  $\alpha$  is a symmetry index, equal to 1 in case of complete symmetry of the carrier (2).

The rate of PFK exhibits a slightly cooperative dependence on the concentration of fructose 6-phosphate:

$$v_{PFK} = V^+ \cdot \left( \frac{K_{i1}}{[Fru-1,6BP] + K_{i1}} \right) \cdot \left( \frac{\frac{[Fru-6P]}{K_{m,Fru6P}}}{1 + \frac{[Fru-6P]}{K_{m,Fru6P}} + \frac{[Fru-1,6BP]}{K_{i2}}} \right) \cdot \left( \frac{\frac{[ATP]}{K_{m,ATP}}}{1 + \frac{[ATP]}{K_{m,ATP}}} \right)$$

The rate of PYK depends cooperatively on the concentration of PEP:

$$v_{\text{PYK}} = V^+ \cdot \frac{\left( \frac{[\text{PEP}]}{K_{\text{m,PEP}}} \right)^n}{1 + \left( \frac{[\text{PEP}]}{K_{\text{m,PEP}}} \right)^n} \cdot \frac{\left( \frac{[\text{ADP}]_c}{K_{\text{m,ADP}}} \right)}{1 + \left( \frac{[\text{ADP}]_c}{K_{\text{m,ADP}}} \right)}$$

$n$  is the cooperativity index (Hill coefficient).

$$K_{\text{m,PEP}} = 0.34 \cdot \left( 1 + \frac{[\text{ATP}]_c}{0.57 \text{ mM}} + \frac{[\text{ADP}]_c}{0.64 \text{ mM}} \right) \text{ mM}.$$

The rate equation for aldolase reads:

$$v_{\text{ALD}} = V^+ \cdot \frac{\frac{[\text{Fru-1,6-BP}]}{K_{\text{m,Fru16BP}}} - \frac{V^-}{V^+} \cdot \frac{[\text{GA-3-P}][\text{DHAP}]}{K_{\text{m,GA3P}} K_{\text{m,DHAP}}}}{1 + \frac{[\text{Fru-1,6-BP}]}{K_{\text{m,Fru16BP}}} + \frac{[\text{GA-3-P}]}{K_{\text{m,GA3P}}} + \frac{[\text{DHAP}]}{K_{\text{m,DHAP}}} + \frac{[\text{Fru-1,6-BP}][\text{GA-3-P}]}{K_{\text{m,Fru16BP}} K_{\text{1,GA3P}}} + \frac{[\text{GA-3-P}][\text{DHAP}]}{K_{\text{m,GA3P}} K_{\text{m,DHAP}}}}$$

$$\text{in which } K_{\text{m,Fru16BP}} = 9 \cdot 10^{-3} \cdot \left( 1 + \frac{[\text{ATP}]_g}{0.68 \text{ mM}} + \frac{[\text{ADP}]_g}{1.51 \text{ mM}} + \frac{[\text{AMP}]_g}{3.65 \text{ mM}} \right) \text{ mM}.$$

The hydrolysis of ATP for free-energy-dissipating processes was described by:

$$v_{\text{ATP utilization}} = k \cdot \frac{[\text{ATP}]}{[\text{ADP}]}$$

The differential equations used were the following:

$$\frac{d[\text{Glc}]_i}{dt} = \frac{v_{\text{glucose transport}} - v_{\text{HK}}}{V_{\text{tot}}}$$

$$\frac{d[\text{hexose-P}]_g}{dt} = \frac{v_{\text{HK}} - v_{\text{PFK}}}{V_g}$$

$$\frac{d[\text{Fru-1,6-BP}]_g}{dt} = \frac{v_{\text{PFK}} - v_{\text{ALD}}}{V_g}$$

$$\frac{d[\text{triose-P}]}{dt} = \frac{2v_{\text{ALD}} - v_{\text{GAPDH}} - v_{\text{GDH}} + v_{\text{GPO}}}{V_{\text{tot}}}$$

$$\frac{d[1,3\text{-BPGA}]_g}{dt} = \frac{v_{\text{GAPDH}} - v_{\text{PGK}}}{V_g}$$

$$\frac{d[\text{N}]}{dt} = \frac{v_{\text{PGK}} - v_{\text{PYK}}}{V_{\text{tot}}}$$

$$\frac{d[\text{PYR}]_c}{dt} = \frac{v_{\text{PYK}} - v_{\text{pyruvate transport}}}{V_c}$$

$$\frac{d[\text{NADH}]_g}{dt} = \frac{v_{\text{GAPDH}} - v_{\text{GDH}}}{V_g}$$

$$\frac{d[\text{P}]_g}{dt} = \frac{-v_{\text{HK}} - v_{\text{PFK}} + v_{\text{PGK}} + v_{\text{GK}}}{V_g}$$

$$\frac{d[\text{P}]_c}{dt} = \frac{v_{\text{PYK}} - v_{\text{ATP utilization}}}{V_c}$$

From the above variables the other variables were calculated:

$$[\text{Glc-6-P}]_g = \frac{[\text{hexose-P}]_g}{1 + K_{\text{eq,PGI}}}$$

$$[\text{Fru-6-P}]_g = [\text{hexose-P}]_g - [\text{Glc-6-P}]_g$$

$$[\text{DHAP}]_c = \frac{-b + \sqrt{b^2 - 4ac}}{2a}$$

in which:

$$a = K_{\text{eq,TIM}} \cdot \frac{V_c}{V_g}$$

$$b = [\text{Q}] \cdot \left(1 + K_{\text{eq,TIM}}\right) + \frac{V_c}{V_g} \cdot C_5 - [\text{triose-P}] \cdot \left(1 + \frac{V_c}{V_g}\right) \cdot K_{\text{eq,TIM}}$$

$$c = -[\text{triose-P}] \cdot \left(1 + \frac{V_c}{V_g}\right) \cdot C_5$$

and:

$$\begin{aligned} [\text{Q}] &= [\text{DHAP}]_g + [\text{GA-3-P}]_g + [\text{Gly-3-P}]_g \\ &= C_{4,\text{antiporter}} - [\text{Glc-6-P}]_g - [\text{Fru-6-P}]_g \\ &\quad - 2[\text{F-1,6-BP}]_g - [1,3\text{-PGA}]_g - 2[\text{ATP}]_g - [\text{ADP}]_g \end{aligned}$$

$$[\text{DHAP}]_g = \frac{[\text{Q}] \cdot [\text{DHAP}]_c}{C_5 + K_{\text{eq,TIM}} \cdot [\text{DHAP}]_c}$$

$$[\text{Gly-3-P}]_c = C_5 - [\text{DHAP}]_c$$

$$[\text{GA-3-P}]_g = K_{\text{eq,TIM}} \cdot [\text{DHAP}]_g$$

$$[\text{Gly-3-P}]_g = [\text{Q}] - [\text{DHAP}]_g - [\text{GA-3-P}]_g$$

$$[\text{3-PGA}] = \frac{[\text{N}] \cdot \left(1 + \frac{V_c}{V_g}\right)}{1 + \left(1 + K_{\text{eq,PGM}} + K_{\text{eq,PGM}} K_{\text{eq,ENO}}\right) \cdot \frac{V_c}{V_g}}$$

$$[2\text{-PGA}]_c = K_{\text{eq,PGM}} \cdot [3\text{-PGA}]$$

$$[\text{PEP}]_c = K_{\text{eq,ENO}} \cdot [2\text{-PGA}]_c$$

$$[\text{ATP}]_g = \frac{-b_g + \sqrt{b_g^2 - 4a_g c_g}}{2a_g}$$

in which:

$$a_g = 1 - 4K_{\text{eq}}$$

$$b_g = C_1 - [\text{P}]_g \cdot (1 - 4K_{\text{eq,AK}})$$

$$c_g = -K_{\text{eq}} \cdot [\text{P}]_g^2$$

$$[\text{ADP}]_g = [\text{P}]_g - 2[\text{ATP}]_g$$

$$[\text{AMP}]_g = C_1 - [\text{ATP}]_g - [\text{ADP}]_g$$

To obtain the cytosolic concentrations  $[\text{ATP}]_c$ ,  $[\text{ADP}]_c$ , and  $[\text{AMP}]_c$ ,  $P_c$  was substituted for  $P_g$ , and  $C_2$  for  $C_1$ .

$$[\text{NAD}^+]_g = C_3 - [\text{NADH}]_g$$

#### Parameter values

|                   |                       |       |                                                                         |
|-------------------|-----------------------|-------|-------------------------------------------------------------------------|
| Glucose transport | $V^+$                 | 106.2 | $\text{nmol} \cdot \text{min}^{-1} \cdot (\text{mg cell protein})^{-1}$ |
|                   | $K_{\text{Glc}}$      | 2     | mM                                                                      |
|                   | $\alpha$              | 0.75  |                                                                         |
| HK                | $V^+$                 | 625   | $\text{nmol} \cdot \text{min}^{-1} \cdot (\text{mg cell protein})^{-1}$ |
|                   | $K_{m, \text{Glc}}$   | 0.1   | mM                                                                      |
|                   | $K_{m, \text{Glc6P}}$ | 12    | mM                                                                      |
|                   | $K_{m, \text{ATP}}$   | 0.116 | mM                                                                      |
|                   | $K_{m, \text{ADP}}$   | 0.126 | mM                                                                      |
| PGI               | $K_{\text{eq}}$       | 0.29  |                                                                         |
| PFK               | $V^+$                 | 780   | $\text{nmol} \cdot \text{min}^{-1} \cdot (\text{mg cell protein})^{-1}$ |
|                   | $K_{i1}$              | 15.8  | mM                                                                      |
|                   | $K_{i2}$              | 10.7  | mM                                                                      |
|                   | $K_{m, \text{F6P}}$   | 0.82  | mM                                                                      |

|       |                           |                     |                                                                         |
|-------|---------------------------|---------------------|-------------------------------------------------------------------------|
|       | $K_{m,ATP}$               | $2.6 \cdot 10^{-2}$ | mM                                                                      |
|       | $n$                       | 1.2                 |                                                                         |
| ALD   | $V^+$                     | 184.5               | $\text{nmol} \cdot \text{min}^{-1} \cdot (\text{mg cell protein})^{-1}$ |
|       | $V^-/V^+$                 | 1.19                |                                                                         |
|       | $K_{m,GA3P}$              | $6.7 \cdot 10^{-2}$ | mM                                                                      |
|       | $K_{m,DHAP}$              | $1.5 \cdot 10^{-2}$ | mM                                                                      |
|       | $K_{i,GA3P}$              | $9.8 \cdot 10^{-2}$ | mM                                                                      |
| TIM   | $K_{eq}$                  | 0.045               |                                                                         |
| GAPDH | $V^+$                     | 1470                | $\text{nmol} \cdot \text{min}^{-1} \cdot (\text{mg cell protein})^{-1}$ |
|       | $V^-/V^+$                 | 0.67                |                                                                         |
|       | $K_{S1}(\text{GA-3-P})$   | 0.15                |                                                                         |
|       | $K_{S2}(\text{NAD}^+)$    | 0.45                |                                                                         |
|       | $K_{P1}(\text{1,3-BPGA})$ | 0.1                 |                                                                         |
|       | $K_{P2}(\text{NADH})$     | 0.02                |                                                                         |
| PGK   | $V^+$                     | 640                 | $\text{nmol} \cdot \text{min}^{-1} \cdot (\text{mg cell protein})^{-1}$ |
|       | $V^-/V^+$                 | 0.029               |                                                                         |
|       | $K_{S1}(\text{1,3-BPGA})$ | 0.05                | mM                                                                      |
|       | $K_{S2}(\text{ADP})$      | 0.1                 | mM                                                                      |
|       | $K_{P1}(\text{3-PGA})$    | 1.62                | mM                                                                      |
|       | $K_{P2}(\text{ATP})$      | 0.29                | mM                                                                      |
| PGM   | $K_{eq}$                  | 0.187               |                                                                         |
| ENO   | $K_{eq}$                  | 6.7                 |                                                                         |
| PYK   | $V^+$                     | $2.6 \cdot 10^3$    | $\text{nmol} \cdot \text{min}^{-1} \cdot (\text{mg cell protein})^{-1}$ |
|       | $K_{m,ADP}$               | 0.114               | mM                                                                      |

|                    |                                  |       |                                                                         |
|--------------------|----------------------------------|-------|-------------------------------------------------------------------------|
|                    | $n$                              | 2.5   |                                                                         |
| pyruvate transport | $V^+$                            | 200   | $\text{nmol min}^{-1} \cdot (\text{mg cell protein})^{-1}$              |
|                    | $K_S$ (pyruvate)                 | 1.96  | mM                                                                      |
| GDH                | $V^+$                            | 533   | $\text{nmol min}^{-1} \cdot (\text{mg cell protein})^{-1}$              |
|                    | $V^-/V^+$                        | 0.28  |                                                                         |
|                    | $K_{S1}$ (DHAP)                  | 0.1   | mM                                                                      |
|                    | $K_{S2}$ (NADH)                  | 0.01  | mM                                                                      |
|                    | $K_{P1}$ (Gly-3-P)               | 2     | mM                                                                      |
|                    | $K_{P2}$ (NAD <sup>+</sup> )     | 0.4   | mM                                                                      |
| GK                 | $V^+$                            | 0     | $\text{nmol} \cdot \text{min}^{-1} \cdot (\text{mg cell protein})^{-1}$ |
|                    | $V^-/V^+$                        | 167   |                                                                         |
|                    | $K_{S1}$ (Gly-3-P <sub>g</sub> ) | 5.1   | mM                                                                      |
|                    | $K_{S2}$ (ADP)                   | 0.12  | mM                                                                      |
|                    | $K_{P1}$ (glycerol)              | 0.12  | mM                                                                      |
|                    | $K_{P2}$ (ATP)                   | 0.19  | mM                                                                      |
| GPO                | $V^+$                            | 200   | $\text{nmol} \cdot \text{min}^{-1} \cdot (\text{mg cell protein})^{-1}$ |
|                    | $K_S$ (Gly-3-P <sub>c</sub> )    | 1.7   | mM                                                                      |
| ATP utilization    | $k$                              | 50    | $\text{nmol} \cdot \text{min}^{-1} \cdot \text{mg cell protein}^{-1}$   |
| AK                 | $K_{\text{eq}}$                  | 0.442 |                                                                         |
|                    | $V_{\text{tot}}$                 | 5.7   | $\mu\text{l} \cdot (\text{mg cell protein})^{-1}$                       |
|                    | $V_{\text{o}}/V_{\text{g}}$      | 22.3  |                                                                         |
|                    | $C_1$                            | 4     | mM                                                                      |
|                    | $C_2$                            | 4     | mM                                                                      |
|                    | $C_3$                            | 4     | mM                                                                      |



|       |    |    |
|-------|----|----|
| $C_4$ | 45 | mM |
| $C_5$ | 5  | mM |

### *Model without glycosome*

The differential equations have been given in *Materials and Methods*. Rate equations and parameter values are the same as those of the model with the glycosome. The moiety conserved sums are:

$$[\text{ATP}] + [\text{ADP}] + [\text{AMP}] = C_6$$

$$[\text{NADH}] + [\text{NAD}] = C_7$$

in which  $C_6$  is 4 mM and  $C_7$  is 4 mM. From the independent variables of the differential equations the dependent variables were calculated as follows:

$$[\text{Glc-6-P}] = \frac{[\text{hexose-P}]}{1 + K_{\text{eq,PGI}}}$$

$$[\text{Fru-6-P}] = [\text{hexose-P}] - [\text{Glc-6-P}]$$

$$[\text{DHAP}] = [\text{Triose-P}]/(1 + K_{\text{eq,TIM}})$$

$$[\text{GA-3-P}] = K_{\text{eq,TIM}} \cdot [\text{DHAP}]$$

$$[\text{3-PGA}] = \frac{[\text{N}]}{1 + K_{\text{eq,PGM}} + K_{\text{eq,PGM}} \cdot K_{\text{eq,ENO}}}$$

$$[\text{2-PGA}] = K_{\text{eq,PGM}} \cdot [\text{3-PGA}]$$

$$[\text{PEP}] = K_{\text{eq,ENO}} \cdot [\text{2-PGA}]$$

ATP, ADP and AMP were calculated from variable P as in the model with the glycosome, but P is substituted for  $P_g$  and  $C_6$  for  $C_1$

$$[\text{NAD}^+] = C_7 - [\text{NADH}].$$

1. Bakker B.M., Michels P.A.M., Opperdoes, F.R. & Westerhoff, H.V. (1997) *J. Biol. Chem.* **272**, 3207-3215.
2. Bakker B.M., Michels P.A.M., Opperdoes, F.R. & Westerhoff, H.V. (1999) *J. Biol. Chem.* **274**, 14551-14559.
